# Supplementary material for: Microinjection-assisted synthesis of Pt–Pd hollow nanoparticles for enhanced methanol oxidation reactions
Source: Royal Society of Chemistry journal article supplement (doi:10.1039/d5ce00080g), 2025-01-01
Supplement: d5ce00080g1.pdf [file d5ce00080g1.pdf]

## Microinjection assistant synthesis of Pt-Pd hollow nanoparticles for enhanced methanol oxidation reaction

Dan Zhao,<sup>a#</sup> Pan Zeng,<sup>b#</sup> Xinyu Wang,<sup>a</sup> Fuquan Wang,<sup>c</sup> Huiting Wu,<sup>a</sup> Yujia Zhai,<sup>a</sup> Dandan Men,<sup>\*c</sup> Yiqiang Sun,<sup>d</sup> Wenshan Qu,<sup>\*a</sup> Haijian Li,<sup>\*c</sup>

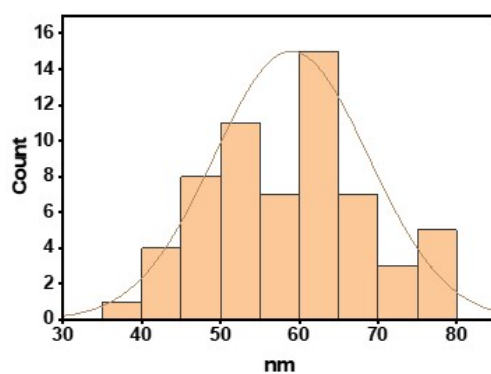

Figure S1. Size distribution of the Pt-Pd HNns.

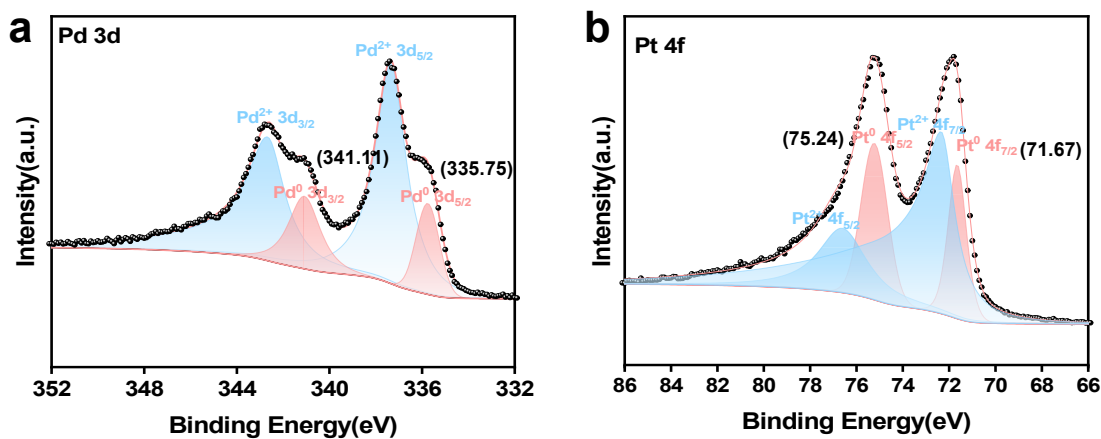

Figure S2. XPS spectra of the commercial catalysts: (a) Pd and (b) Pt.
